# Supplementary material for: Novel Phenanthrene-Degrading Bacteria Identified by DNA-Stable Isotope Probing
Source: PubMed Central journal article supplement (PMC4476716; doi:10.1371/journal.pone.0130846), 2015-06-22
Supplement: pone.0130846.s001.pdf [file pone.0130846.s001.pdf]

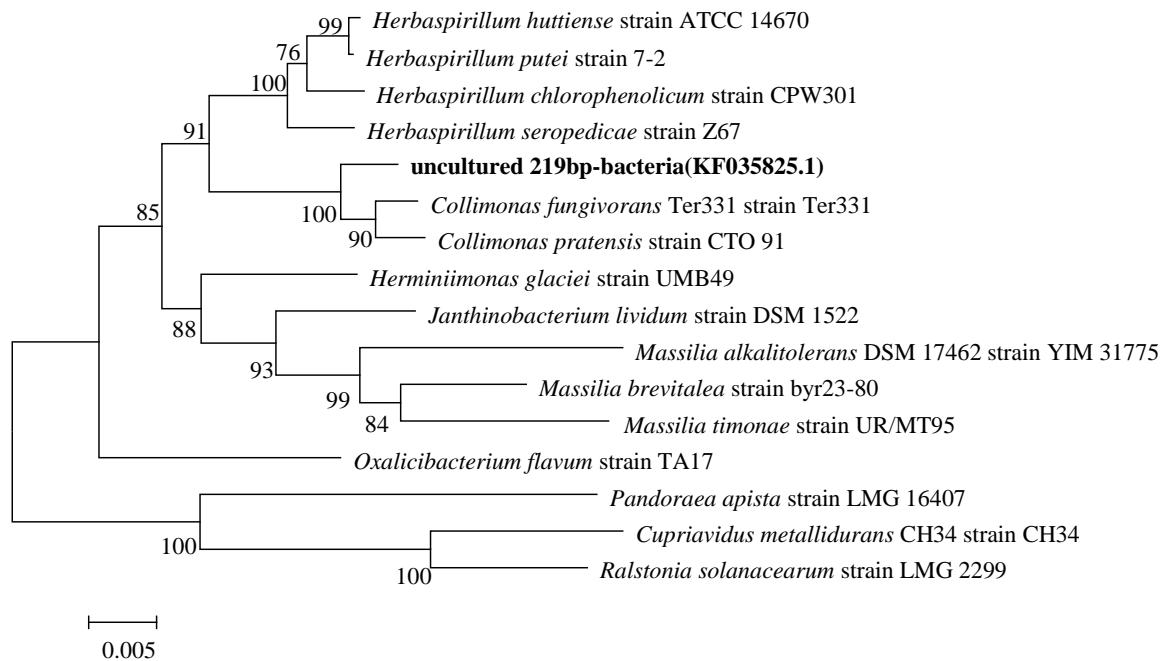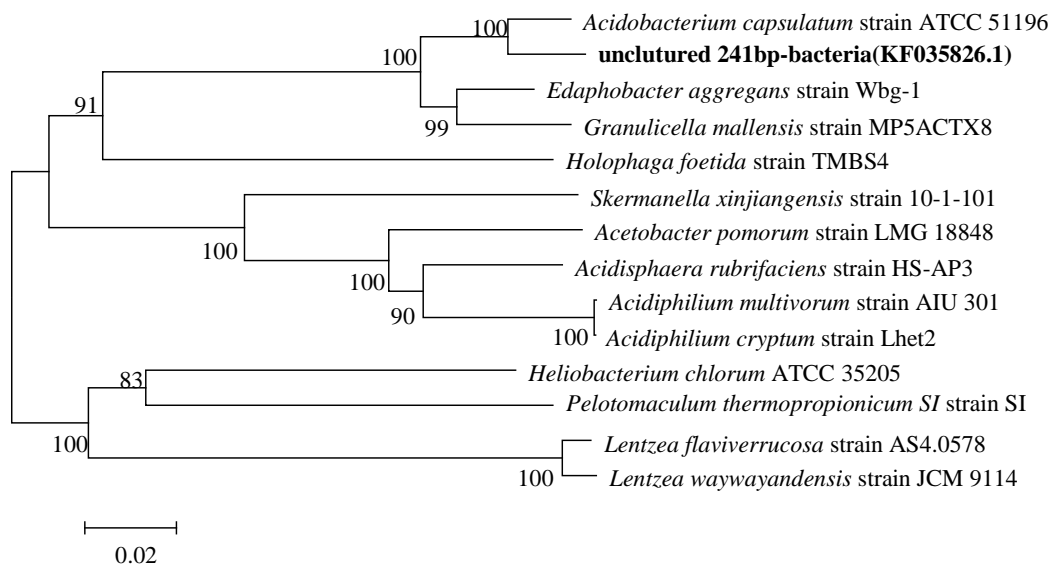

**S1 Fig. Phylogenetic tree of the unclutured degraders.**

Phylogenetic tree for the taxonomic location of the bacteria corresponding 219- and 241-bp TRFs. The tree is based on 16S rDNA sequence and produced by MEGA 5.0.
