# Supplementary material for: Novel Phenanthrene-Degrading Bacteria Identified by DNA-Stable Isotope Probing
Source: PubMed Central journal article supplement (PMC4476716; doi:10.1371/journal.pone.0130846), 2015-06-22
Supplement: pone.0130846.s002.pdf [file pone.0130846.s002.pdf]

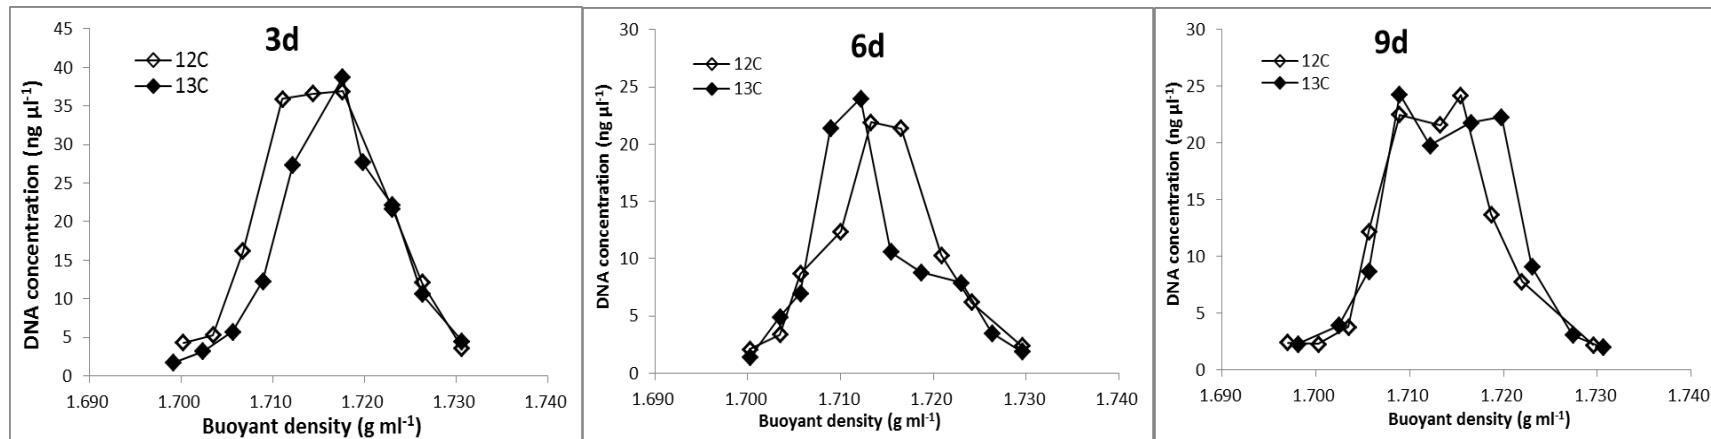

**S2 Fig. The total DNA distribution in different buoyant density.**

The density distribution of total DNA in the micocosms amended with unlabeled (<sup>12</sup>C) or labeled (<sup>13</sup>C) PHE after centrifugation on days 3, 6 and 9.
